# Supplementary material for: Targeting folded RNA: a branched peptideboronic acid that binds to a large surface area of HIV-1 RRE RNA
Source: Royal Society of Chemistry journal article supplement (doi:10.1039/c3ob41053f), 2013-08-02

## Supporting Information

# Targeting folded RNA: A branched peptide boronic acid that binds to a large surface area of HIV-1 RRE RNA

Wenyu Zhang, David I. Bryson, Jason B. Crumpton, Jessica Wynn, and Webster L. Santos\*

Department of Chemistry and Virginia Tech Center for Drug Discovery

Virginia Tech, Blacksburg, Virginia 24061

### Contents

|                                    |    |
|------------------------------------|----|
| 1. BPBA 1.1 and BPBA 1.2.....      | S2 |
| 2. Hill Plots.....                 | S3 |
| 3. MTT Assay.....                  | S5 |
| 4. HPLC and MALDI/MS of BPBAs..... | S6 |

**Figure S1.** Sequences **BPBA 1.1** and **BPBA 1.2** with structures of **K<sub>BZ</sub>** and **K<sub>FBA</sub>**

**BPBA 1.1** (WKK)<sub>2</sub>\***K<sub>BZ</sub>**YWY

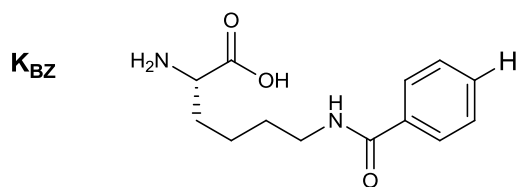

**BPBA 1.2** (WKK)<sub>2</sub>\***K<sub>FBA</sub>**YWY

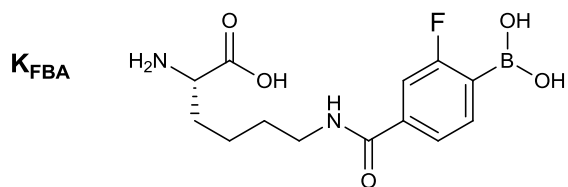

**Figure S2.** Hill plot of **BPBA1** (from dot blot data) against (A) RRE IIB Wild Type, (B) HexaLoop, (C) Stem B Deleted, (D) Stem A/Loop A Deleted, (E) Loop B/Bulge A Deleted, (F) Loop A(A-G)/B/Bulge A Deleted, and (G) Loop A/B/Bulge A Deleted.

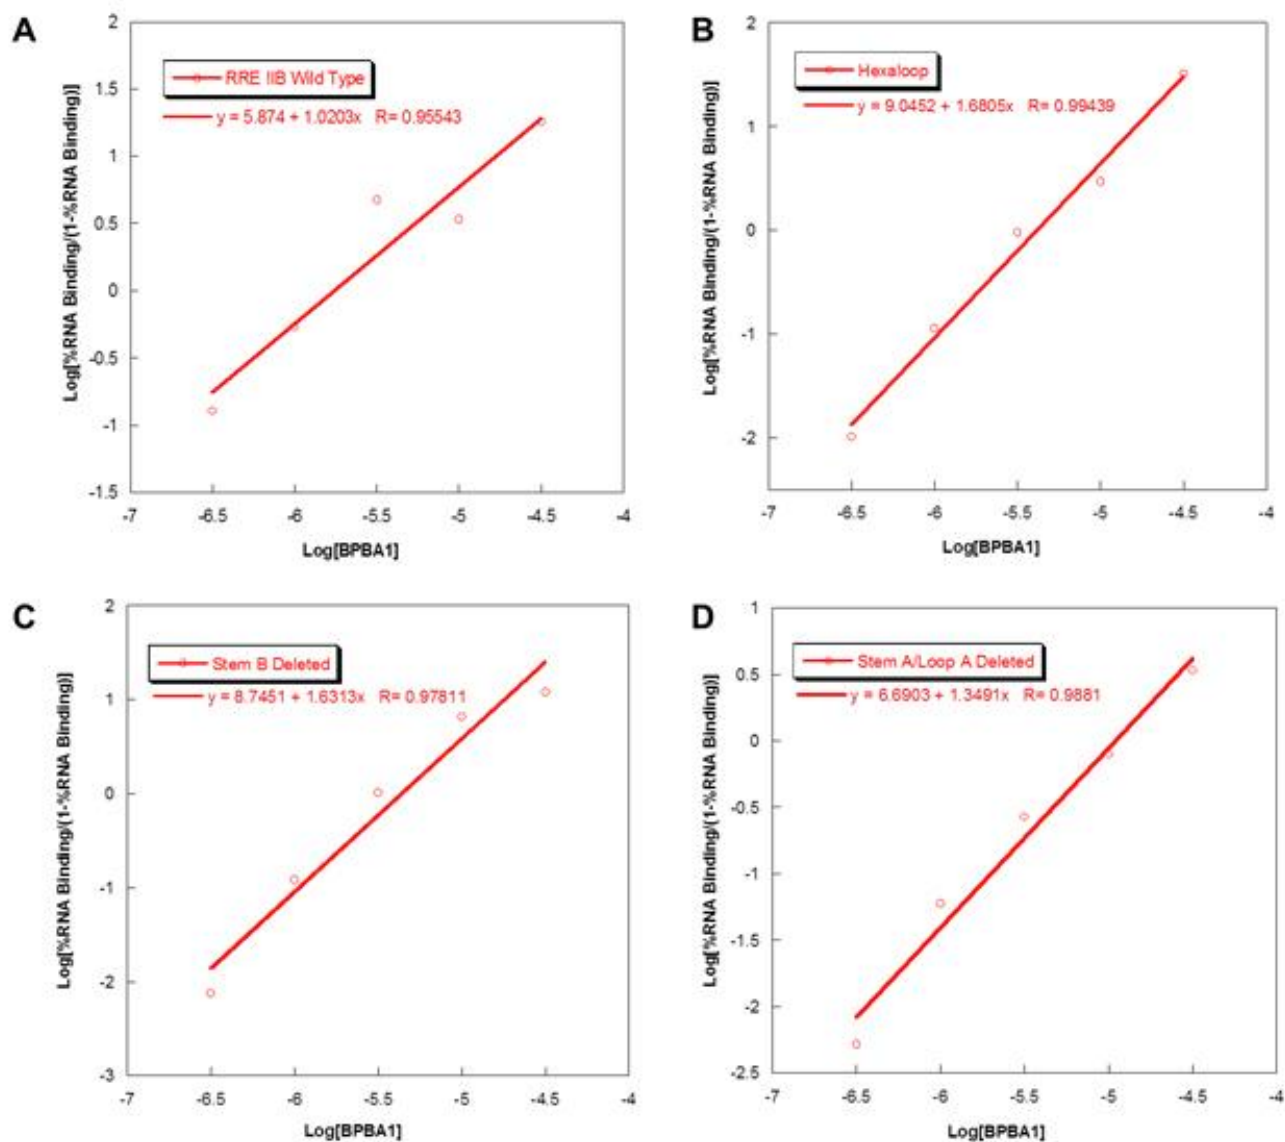

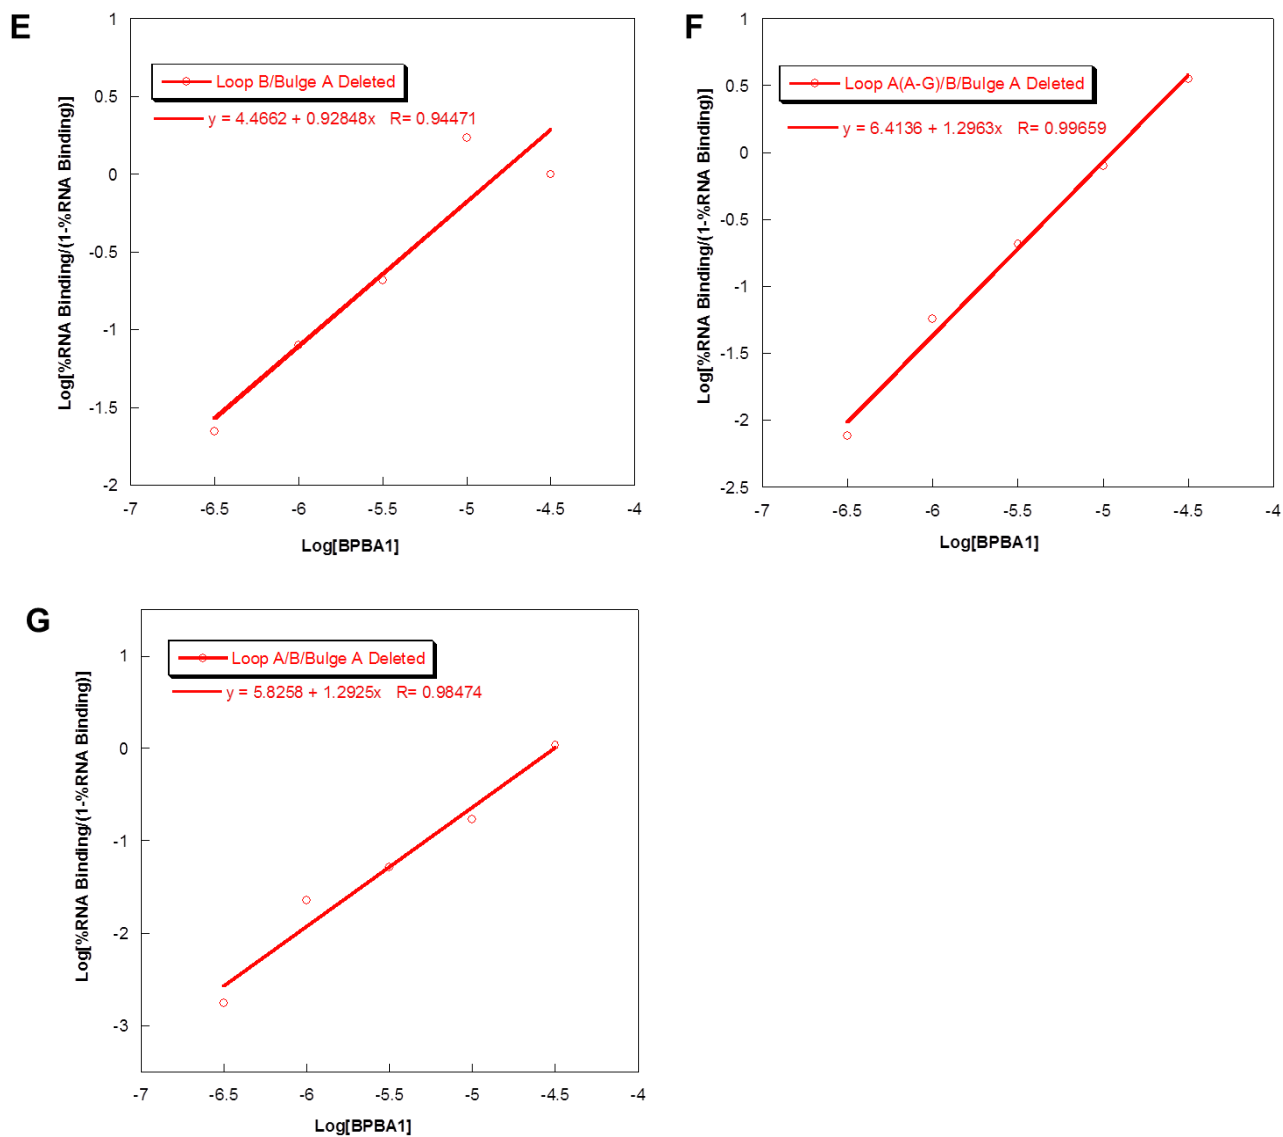

**Figure S3.** MTT toxicity assay of HeLa cells with **BPBA1** at varying concentrations over 24 hours. The relative cell viability data shown is the average of three independent experiments, each run in triplicate.

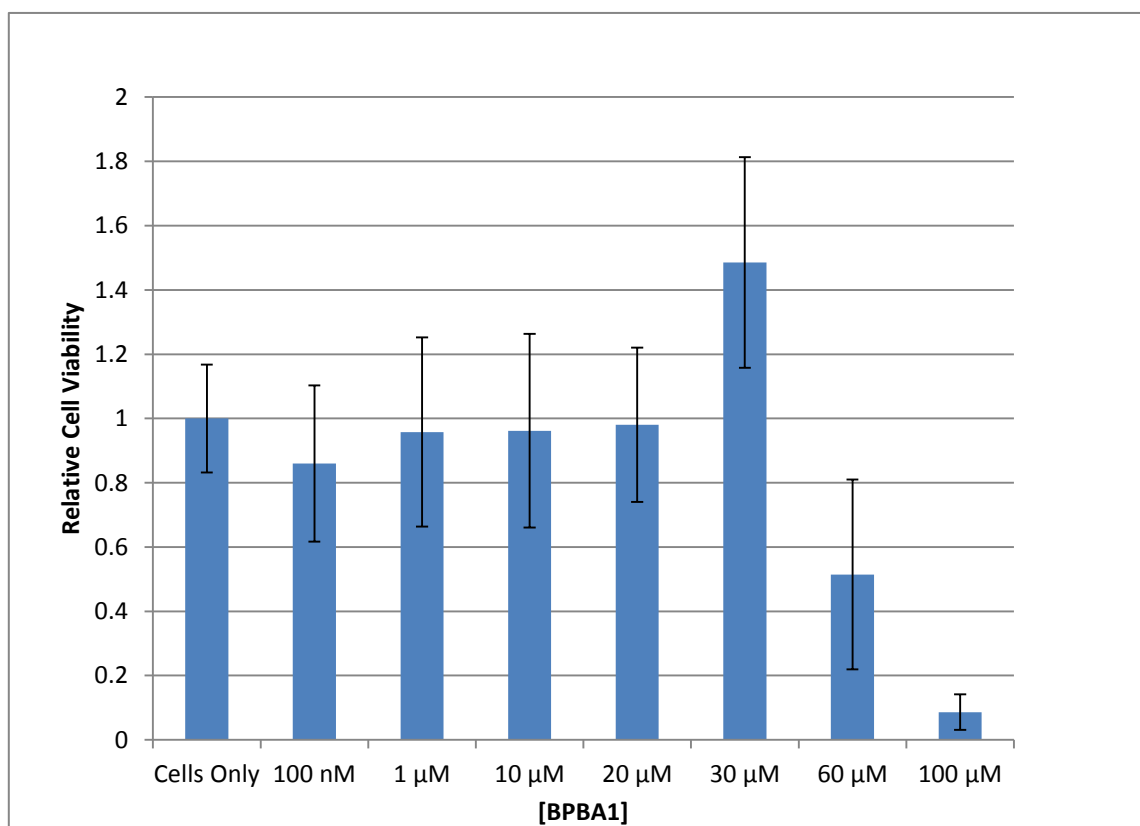

## Figure S4. Linear Control Peptides and Random Peptide HPLC Condition, Purity, and Identification by MALDI/MS

HPLC Solvent A: 0.1% TFA in Milli-Q water, Solvent B: HPLC grade acetonitrile. Peptides purity were determined using a Jupiter 4  $\mu\text{m}$  Proteo 90 Å analytical column (Phenomenex), and peptide identity was confirmed by MALDI-TOF analysis.

**LPBA1** Predicted Mass: 1423.3, Mass Detected: 1423.8

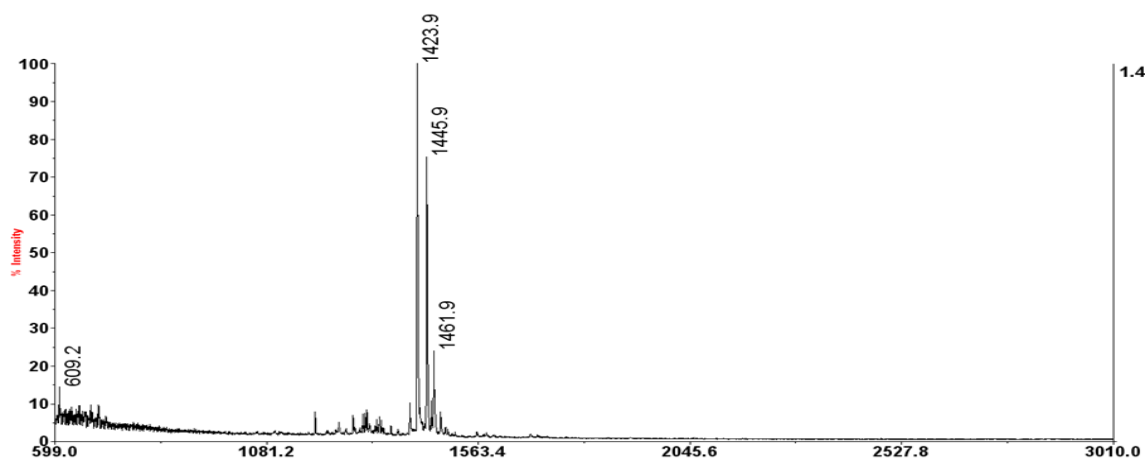

The Purity (97%) was determined by analytical HPLC employing a linear gradient of 12%-30% B in A in 30min at a flow rate of 0.2mL/min following a wash procedure.

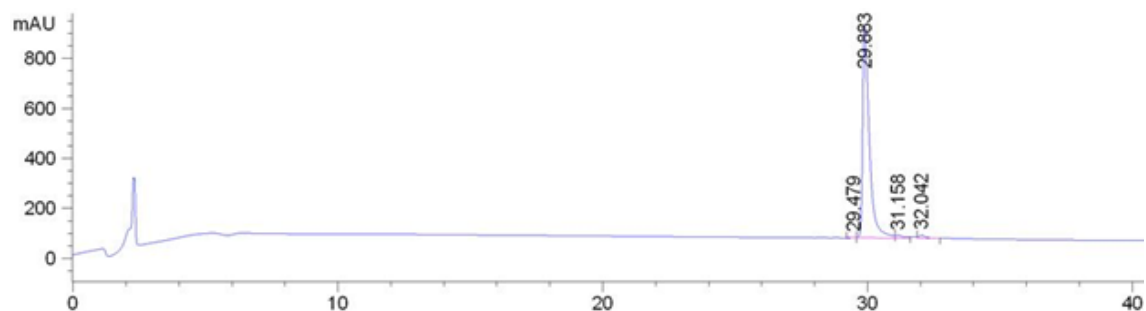

**LPBA2** Predicted Mass: 1193.5, Mass Detected: 1193.8

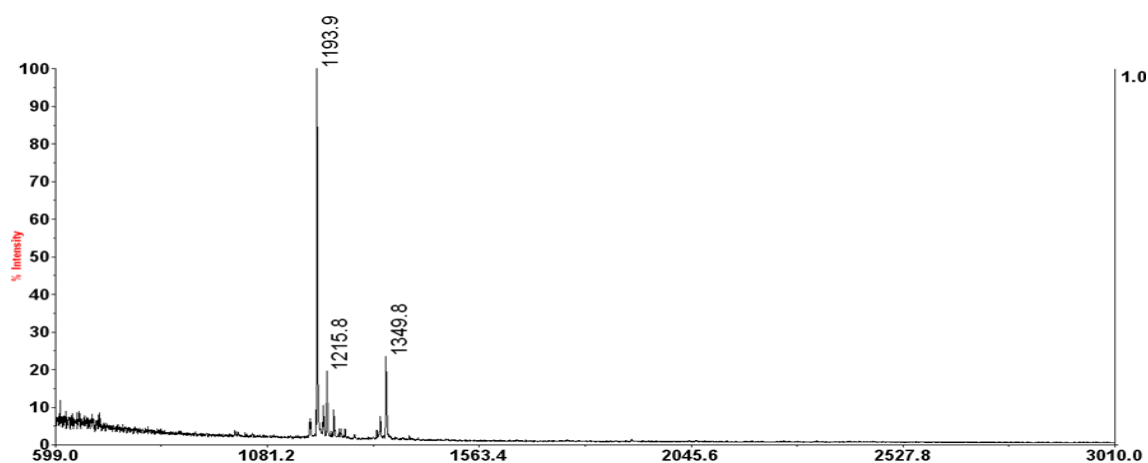

The Purity (99%) was determined by analytical HPLC employing a linear gradient of 8%-28% B in A in 30min at a flow rate of 0.2mL/min following a wash procedure.

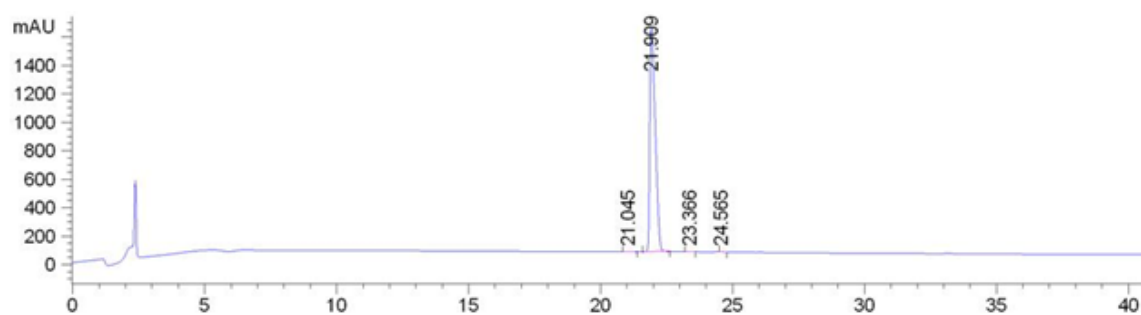

**LPBA3** Predicted Mass: 1535.7, Mass Detected: 1536.8

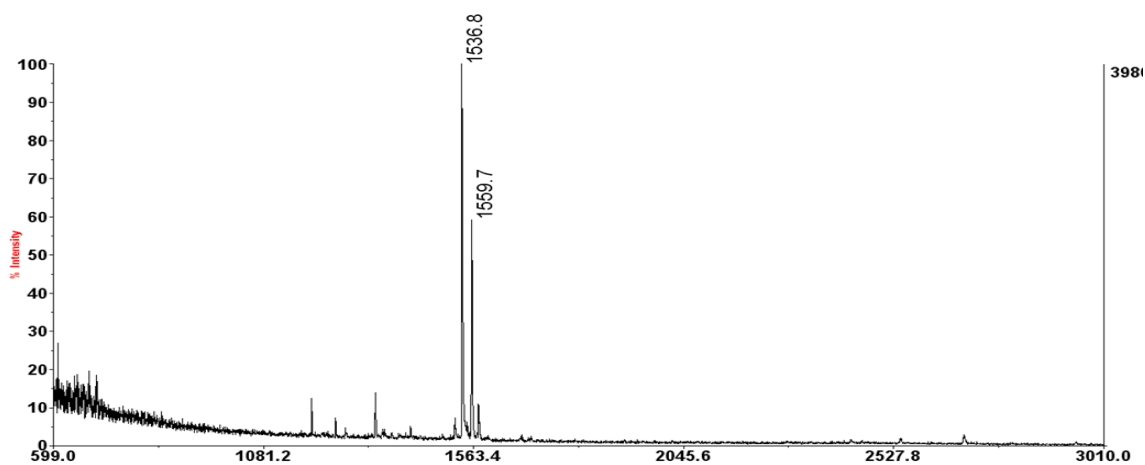

The Purity (90%) was determined by analytical HPLC employing a linear gradient of 10%-30% B in A in 30min at a flow rate of 0.2mL/min following a wash procedure.

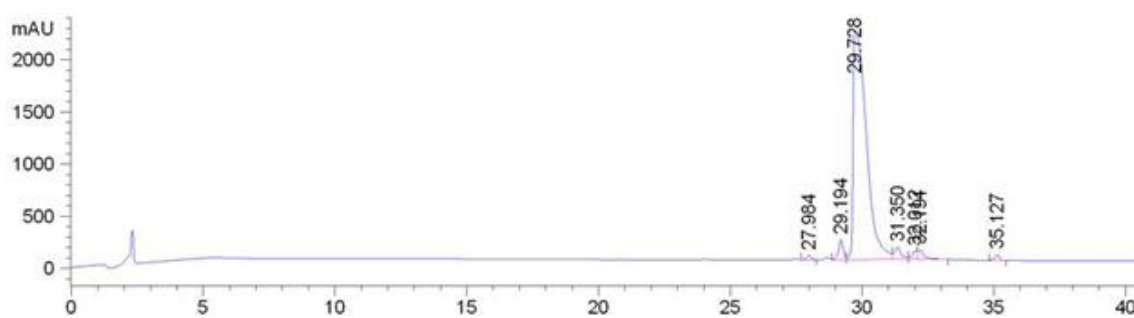



**LPBA4** Predicted Mass: 1865.9, Mass Detected: 1866.6

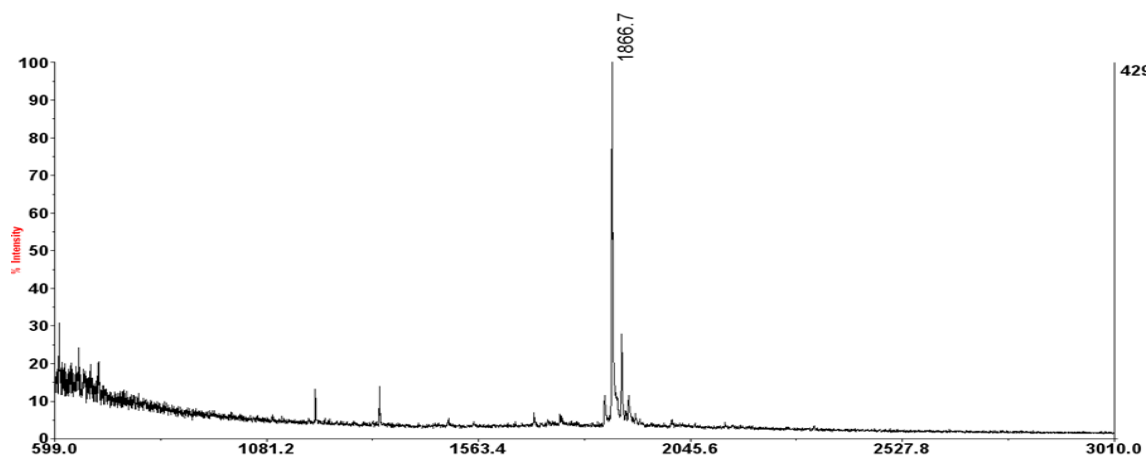

The Purity (96%) was determined by analytical HPLC employing a linear gradient of 10%-30% B in A in 30min at a flow rate of 0.2mL/min following a wash procedure.

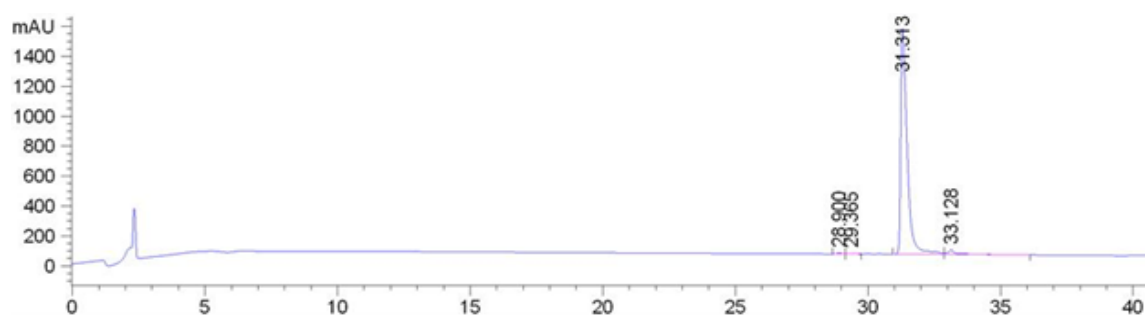

**LPBA5** Predicted Mass: 1865.9, Mass Detected: 1867.0

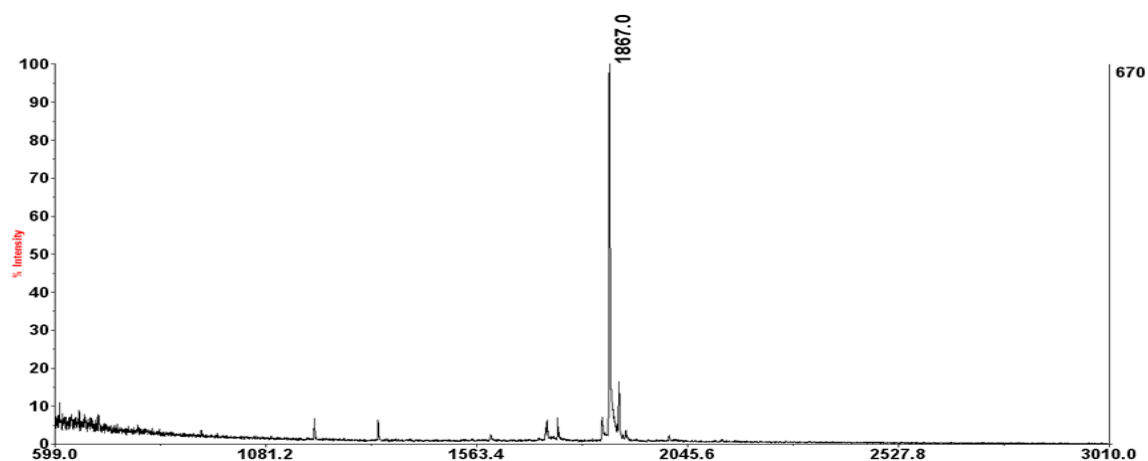

The Purity (94%) was determined by analytical HPLC employing a linear gradient of 12%-30% B in A in 30min at a flow rate of 0.2mL/min following a wash procedure.

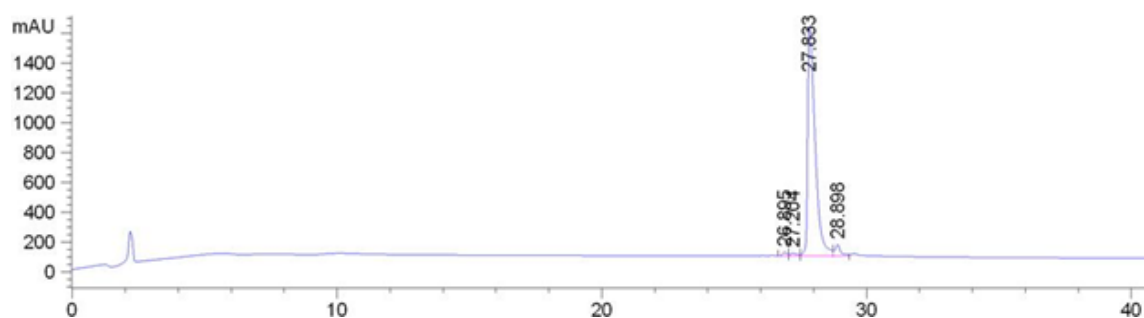

**RPBA1** Predicted Mass: 1979.1, Mass Detected: 1980.2

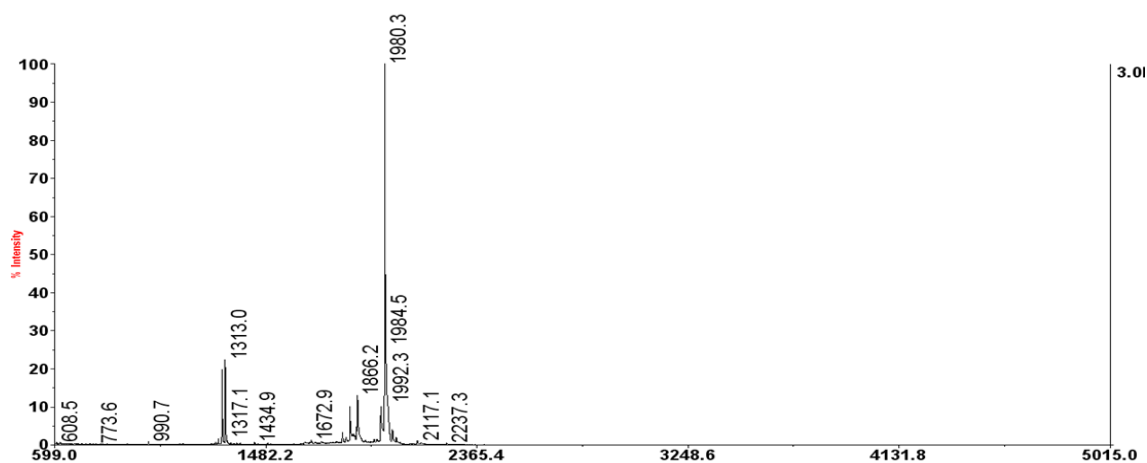

The Purity (90%) was determined by analytical HPLC employing a linear gradient of 12%-30% B in A in 30min at a flow rate of 0.2mL/min following a wash procedure.

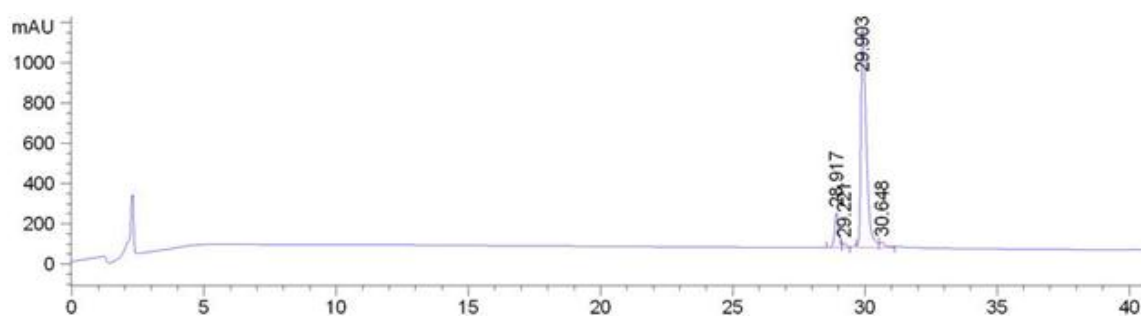

Supplement: c3ob41053f.pdf [file c3ob41053f.pdf]
